# Supplementary material for: Copy Number Variations of KLF6 Modulate Gene Transcription and Growth Traits in Chinese Datong Yak (Bos Grunniens)
Source: MDPI journal article supplement (doi:10.3390/ani8090145), 2018-08-21
Supplement: s1 [file s1]

**Table S 1.** Distribution of the *KLF6* gene CNV types among breeds.

| Breeds      | Sample size | NV type    |            |            |
|-------------|-------------|------------|------------|------------|
|             |             | Gain       | Loss       | Normal     |
| Datong yak  | 30          | 6.7% (2)   | 26.7% (8)  | 66.7% (20) |
| Polled yak  | 30          | 96.7% (29) | -          | 3.3% (1)   |
| Tianzhu Yak | 30          | 10.0% (3)  | 56.7% (17) | 33.3% (10) |
| Plateau Yak | 30          | 6.7% (2)   | 56.7% (17) | 36.7% (11) |
| Gannan yak  | 30          | 10.0% (3)  | 60.0% (18) | 30% (9)    |
| Overall     | 150         | 26% (39)   | 40% (60)   | 34% (51)   |

**Table S2.** Pairwise comparison of CNV of the *KLF6* gene in five Chinese domestic yak breeds.

| Yak breeds         | Mean Diff. | <i>p</i> -Value | q or t ratio | Significance | 95% CI of diff |
|--------------------|------------|-----------------|--------------|--------------|----------------|
| Datong vs Polled   | -1.3       | 0.0001          | 12           | ***          | -1.7 to -0.83  |
| Datong vs Tianzhu  | 0.14       | 0.35            | 1.2          | NS           | -0.29 to 0.57  |
| Datong vs Gannan   | 0.45       | 0.012           | 4.1          | *            | 0.020 to 0.88  |
| Datong vs Plateau  | 0.24       | 0.1             | 2.2          | Ns           | -0.19 to 0.67  |
| Polled vs Tianzhu  | 1.4        | 0.0001          | 13           | ***          | 0.97 to 1.8    |
| Polled vs Gannan   | 1.7        | 0.0001          | 16           | ***          | 1.3 to 2.1     |
| Polled vs Plateau  | 1.5        | 0.0001          | 14           | ***          | 1.1 to 1.9     |
| Tianzhu vs Gannan  | 0.31       | 0.085           | 2.9          | NS           | -0.12 to 0.74  |
| Tianzhu vs Plateau | 0.11       | 0.57            | 0.97         | NS           | -0.32 to 0.54  |
| Gannan vs Plateau  | -0.21      | 0.20            | 1.9          | NS           | -0.64 to 0.22  |

\*\*\* The variance significant at  $p < 0.0001$ , and \*  $p < 0.05$ , NS, Non significant
